# Supplementary material for: UPLC-MS/MS analysis and bioactivity comparison of wild and cultivated Taihangia rupestris leaves: antioxidant and α-glucosidase inhibitory activities with active compound screening
Source: Royal Society of Chemistry journal article supplement (doi:10.1039/d6ra00256k), 2026-05-26
Supplement: d6ra00256k1.pdf [file d6ra00256k1.pdf]

# **UPLC-MS/MS Analysis and Bioactivity Comparison of Wild and Cultivated *Taihangia rupestris* Leaves: Antioxidant and $\alpha$ -Glucosidase Inhibitory Activities with Active Compound Screening**

**Jin-tuo Yin<sup>1#</sup>, De-mao Wang<sup>2#</sup>, Xue-chun Wu<sup>2</sup>, Juan Lu<sup>2</sup>, Zheng-ming Qian<sup>3,4</sup>, De-qiang Li<sup>2\*</sup>,**

**Rui Feng<sup>1\*</sup>**

*1. Department of Pharmacy, the Fourth Hospital of Hebei Medical University, Shijiazhuang 050011, Hebei Province, China*

*2. Department of Pharmacy, the Second Hospital of Hebei Medical University, Shijiazhuang 050000, Hebei province, China*

*3. College of Medical Imaging Laboratory and Rehabilitation, Xiangnan University, Chenzhou, Hunan province 423000, China*

*4. Key Laboratory of State Administration of Traditional Chinese Medicine, Shenzhen HEC Industrial Development Co., LTD., Shenzhen, Guangdong province 518053, China*

\* Corresponding authors:

Deqiang Li, E-mail: [lideqiang@hebme.edu.cn](mailto:lideqiang@hebme.edu.cn)

Rui Feng, E-mail: [fengrui-125@163.com](mailto:fengrui-125@163.com)

# The two authors contributed equally to this work.

## **1 The TFC and TPC, antioxidant capacity and $\alpha$ -glucosidase inhibition in vitro**

### **1.1 Determination of total flavonoid content (TFC)**

The most commonly used method for the determination of flavonoid content, the  $\text{Al}(\text{NO}_3)_3$ - $\text{NaNO}_2$ - $\text{NaOH}$  colorimetric method, was selected to determine the total flavonoid content [10]. 0.1 mL of the sample extract was precisely measured in a 10 mL measuring flask,  $\text{NaNO}_2$  solution (0.05 g/mL, 0.5 mL),  $\text{Al}(\text{NO}_3)_3$  solution (0.1 g/mL, 0.5 mL), and  $\text{NaOH}$  solution (4%, 5 mL) were added in sequence, and then, the volume was set with 85% methanol. After the reaction was completed and centrifuged (10000 rpm, 3 min), 0.1 mL of the supernatant was taken in a 96-well enzyme plate, the absorbance was measured at 510 nm, and the average value was taken after several parallel measurements.

The sample extraction solution was replaced with 85% methanol solution as a blank control. The sample extraction solution was replaced with 0.5, 1.0, 1.5, 2.0, 2.5, and 3.0 mL of rutin the control solutions (0.1 mg/mL), and then, processed according to the above method to detect the absorbance of the control solutions at 510 nm wavelength. Finally, a straight line was fitted with the measured results using the concentration of rutin (mg/mL) as the horizontal coordinate, and the average absorbance after deducting the blank (A) as the vertical coordinate, which was used as the TFC standard curve. The rutin equivalents of the sample powder TFC were calculated according to equation (1):

$$\text{equivalent of the control product (mg RE/g)} = \frac{x \times \text{dilution times} \times V}{M} \quad (1)$$

(x: the amount equivalent to the control contained in the measured solution calculated from the corresponding standard curve, mg/mL; dilution: the ratio of the sample extract to the concentration at the time of measurement; V: volume of extraction solvent used in the sample extract, mL; M: the weight of precisely weighed *T. rupestris* powder, g)

### **1.2 Determination of total phenolic content (TPC)**

In view of the limitations of the method for the determination of total flavonoid

content [11], the forintol method was chosen for the determination of total phenol content as a supplement to the determination of antioxidant compounds content. The sample extract (100 mg/mL) was diluted 10-fold with 85% methanol and 0.1 mL was placed in a 10 mL measuring flask. Forintol reagent (0.5 mL), purified water and of Na<sub>2</sub>CO<sub>3</sub> solution (10%, 1 mL) were added into the measuring flask. 0.2 mL of the reacted solution was taken into a 96-well enzyme labeling plate, the absorbance was determined at 765 nm, and take the average value was taken after at least three parallel measurements.

The sample extract was replaced with the extraction solvent as a blank control. The sample extract was replaced with 0.25, 0.50, 0.75, 1.00, 1.25, 1.50, and 1.75 mL of 0.1 mg/mL gallic acid control solution, according to the above method, the absorbance value of the control products at 765 nm was measured, and a straight line was fitted by taking the gallic acid concentration (mg/mL) as the horizontal coordinate, and the average absorbance after deducting the blank (A) as the vertical coordinate. A straight line was fitted as the TPC standard curve, and the gallic acid equivalent of TPC of the sample powder was calculated according to the formula (1).

### ***1.3 Iron Reduction Antioxidant Capacity (FRAP)***

FRAP reaction solution was prepared for later use [10,12]. 0.4 mg/mL of the sample extract and the above FRAP reaction solution were put into a 96-well enzyme plate, mixed well, and then the absorbance was measured at 593 nm. The average value was taken after at least three parallel measurements.

The sample extract was replaced with 85% methanol as a blank control solution. The sample extract was replaced with Trolox solution at different concentrations between 0 and 1.0 mmol/L, and then processed and detected by the above method. Finally, a straight line was fitted to the FRAP standard curve by taking the concentration of the Trolox solution (mmol/L) as the horizontal coordinate and the average absorbance (A) after deducting the

blank as the vertical coordinate. The FRAP Trolox equivalent of the sample powder was calculated according to the formula (1).

#### ***1.4 Copper ion reduction method (CUPRAC)***

Copper chloride solution (10 mmol/L, 1mL), ammonium acetate solution (pH=7.0, 1 mol/L, 1mL), neocuproine solution (7.5 mmol/L, 1mL) and the sample extract (0.5 mg/mL, 0.1 mL) were mixed well, and left at room temperature for 30 min before measuring the absorbance of the reacted solution at 450 nm. The average value was taken after at least three parallel measurements [13].

The sample extract was replaced with 85% methanol as a blank control solution. The sample extract was replaced with Trolox solution diluted with 85% methanol to different concentrations between 0-1.2 mmol/L and processed for detection by the above method. A straight line was fitted to the CUPRAC standard curve by taking the concentration of Trolox solution (mmol/L) as the horizontal coordinate and the average absorbance (A) after deduction of the blank as the vertical coordinate. The Trolox equivalents measured by CUPRAC of the sample powder were calculated according to equation (1).

#### ***1.5 Total Reduction Force Method (TRC)***

The sample extract (0.25 mg/mL, 0.2 mL), PBS buffer (0.2 mmol/L, 0.5 mL), potassium ferricyanide solution (10 mg/mL, 0.5 mL), trichloroacetic acid (10%, 0.5 mL), purified water (1.7 mL), and ferric chloride solution (0.1%, 0.34 mL) were added sequentially to carry out the reaction. 200  $\mu$ L of reaction solution was taken in a 96-well enzyme plate to measure the absorbance at 700 nm. The average value was taken after at least three parallel measurements [14].

The sample extract was replaced with 85% methanol as a blank control solution. The sample extract was replaced with Trolox solution diluted with 85% methanol to different concentrations. The concentration of Trolox solution (mmol/L) used for the reaction was

taken as the horizontal coordinate, and the average absorbance (A) after the deduction of the blank was taken as the vertical coordinate, and a straight line was fitted to the TRC standard curve. The TRC Trolox equivalent of the sample powder was calculated according to equation (1).

### ***1.6 DPPH radical scavenging ability***

The sample extract (different concentrations, 20  $\mu$ L) and DPPH solution (0.2 mmol/L, 180  $\mu$ L) were added into a 96-well enzyme plate, and the absorbance at 517 nm was measured as A1. Methanol (85%, 20  $\mu$ L) and DPPH solution (0.2 mmol/L, 180  $\mu$ L) were placed into a 96-well enzyme plate. The absorbance of the solution was measured at 517 nm as A0. A1 and A0 were measured at least three times in parallel and the average value was taken. Different concentrations of Trolox were measured in the same way, and the clearance rate I (%) was calculated according to the clearance rate formula (2). The concentration of Trolox (mmol/L) was used as the horizontal coordinate, and the clearance rate I (%) was used as the vertical coordinate to fit the standard curve of Trolox control, and the IC<sub>50</sub> values of the sample extract and Trolox were obtained from the standard curve [10].

$$I (\%) = \frac{A0 - A1}{A0} \times 100 \quad (2)$$

### ***1.7 $\alpha$ -Glucosidase Inhibition Assay***

The  $\alpha$ -glucosidase solution (1 U/mL) and p-NPG solution (2.5 mmol/L) were prepared with PBS, and the sample extract was diluted into several sample dilutions of different concentrations with PBS buffer. P-NPG substrate solution (40  $\mu$ L) and the solution to be measured (20  $\mu$ L) were added to the 96-well enzyme labeling plate, mixed with appropriate shaking, and preincubated at 37 °C for 5 min. Then,  $\alpha$ -glucosidase (20  $\mu$ L) was added, and the reaction was incubated at 37 °C for 15 min. Finally, the reaction was terminated by adding Na<sub>2</sub>CO<sub>3</sub> (0.1 mol/L, 80  $\mu$ L) [15].

The absorbance was measured at 405 nm using an enzyme marker, and the absorbance

measured when the solution to be tested was the sample dilution was A0; when the solution to be tested was the sample dilution, and then PBS was substituted for the  $\alpha$ -glucosidase assay was A1; when the solution to be tested was the extraction solvent, it was A2; when the solution to be tested was the extraction solvent, and then PBS was substituted for the enzyme solution, it was A3; and the inhibition rate of the reaction was calculated by  $\alpha$ -glucosidase (%) =  $[1 - (A0 - A1)/(A2 - A3)] \times 100$ , and GraphPad Prism 8 software was used to calculate the IC<sub>50</sub> value.

**STable 1. The compounds of *T. rupestris***

| No. | Compound Name                | RT<br>(min) | Formula                                                       | Adduct             | <i>m/z</i><br>(Apex) | <i>m/z</i> (Delta<br>(ppm)) | Library<br>Score (%) | MS <sup>2</sup><br>Fragments( <i>m/z</i> ) |
|-----|------------------------------|-------------|---------------------------------------------------------------|--------------------|----------------------|-----------------------------|----------------------|--------------------------------------------|
| 1   | Raffinose                    | 1.29        | C <sub>18</sub> H <sub>32</sub> O <sub>16</sub>               | M+HCO <sub>2</sub> | 549.167              | -1.118                      | 93                   | 221.06682                                  |
| 2   | Sucrose                      | 1.33        | C <sub>12</sub> H <sub>22</sub> O <sub>11</sub>               | M-H                | 341.108              | -1.916                      | 88                   | 89.02438                                   |
| 3   | Lactose                      | 1.33        | C <sub>12</sub> H <sub>22</sub> O <sub>11</sub>               | M+HCO <sub>2</sub> | 387.114              | -1.654                      | 82                   | 101.02437                                  |
| 4   | 2-Pyrrolidinecarboxylic acid | 1.34        | C <sub>5</sub> H <sub>9</sub> NO <sub>2</sub>                 | M+H                | 116.070              | -2.892                      | 86                   | 70.06504                                   |
| 5   | Quinic acid                  | 1.41        | C <sub>7</sub> H <sub>12</sub> O <sub>6</sub>                 | M-H                | 191.056              | -1.056                      | 92                   | 127.03997                                  |
| 6   | Maleic acid                  | 1.64        | C <sub>4</sub> H <sub>4</sub> O <sub>4</sub>                  | M-H                | 115.004              | -0.753                      | 89                   | 71.01385                                   |
| 7   | Nicotinamide                 | 1.94        | C <sub>6</sub> H <sub>6</sub> N <sub>2</sub> O                | M+H                | 123.055              | -1.114                      | 96                   | 96.04425,<br>80.04945                      |
| 8   | Citric acid                  | 1.95        | C <sub>6</sub> H <sub>8</sub> O <sub>7</sub>                  | M-H                | 191.020              | -1.120                      | 93                   | 111.00875,<br>87.00867                     |
| 9   | L-Tyrosine                   | 1.96        | C <sub>9</sub> H <sub>11</sub> NO <sub>3</sub>                | M+H                | 182.081              | -1.052                      | 97                   | 136.07561,<br>123.04388                    |
| 10  | L-Leucine                    | 1.98        | C <sub>6</sub> H <sub>13</sub> NO <sub>2</sub>                | M+H                | 132.102              | -0.667                      | 89                   | 69.06989,<br>86.09634                      |
| 11  | Adenosine                    | 2.09        | C <sub>10</sub> H <sub>13</sub> N <sub>5</sub> O <sub>4</sub> | M+H                | 268.104              | -1.122                      | 88                   | 136.06178,<br>85.02835                     |
| 12  | Guanine                      | 2.25        | C <sub>5</sub> H <sub>5</sub> N <sub>5</sub> O                | M+H                | 152.057              | 0.0767                      | 81                   | 110.03486,<br>135.03003                    |
| 13  | 5-Hydroxytryptophan          | 2.56        | C <sub>11</sub> H <sub>12</sub> N <sub>2</sub> O <sub>3</sub> | M+H                | 221.092              | -1.304                      | 78                   | 204.0657                                   |
| 14  | Gallic acid                  | 3.38        | C <sub>7</sub> H <sub>6</sub> O <sub>5</sub>                  | M-H                | 169.014              | -1.164                      | 93                   | 107.01409,<br>125.02438                    |
| 15  | Pyrogallol                   | 3.38        | C <sub>6</sub> H <sub>6</sub> O <sub>3</sub>                  | M-H                | 125.024              | -0.658                      | 81                   | 81.03464,<br>97.02967                      |
| 16  | 5-Hydroxymethylfurfural      | 3.42        | C <sub>6</sub> H <sub>6</sub> O <sub>3</sub>                  | M+H                | 127.039              | -1.013                      | 84                   | 81.03337,<br>109.02843                     |

| No. | Compound Name                  | RT (min) | Formula                                                       | Adduct             | m/z (Apex) | m/z (Delta ppm) | Library Score (%) | MS <sup>2</sup> Fragments(m/z) |
|-----|--------------------------------|----------|---------------------------------------------------------------|--------------------|------------|-----------------|-------------------|--------------------------------|
| 17  | L-Phenylalanine                | 3.46     | C <sub>9</sub> H <sub>11</sub> NO <sub>2</sub>                | M+H                | 166.086    | -0.747          | 85                | 120.08067                      |
| 18  | Cinnamic acid                  | 3.46     | C <sub>9</sub> H <sub>8</sub> O <sub>2</sub>                  | M+H                | 149.060    | -0.323          | N/A               | 121.02823                      |
| 19  | Helicid                        | 4.61     | C <sub>13</sub> H <sub>16</sub> O <sub>7</sub>                | M+HCO <sub>2</sub> | 329.088    | -0.682          | N/A               | 108.02161                      |
| 20  | 4-Methoxysalicylic acid        | 4.63     | C <sub>8</sub> H <sub>8</sub> O <sub>4</sub>                  | M-H                | 167.035    | -0.863          | 93                | 123.04527                      |
| 21  | 4-Methyl-6,7-dihydroxycoumarin | 4.82     | C <sub>10</sub> H <sub>8</sub> O <sub>4</sub>                 | M+H                | 193.049    | -0.605          | 85                | 147.04443,<br>103.05424        |
| 22  | 5,7-Dihydroxy-4-methylcoumarin | 4.82     | C <sub>10</sub> H <sub>8</sub> O <sub>4</sub>                 | M+H                | 193.049    | -0.605          | 85                | 137.06009,<br>103.05424        |
| 23  | 3,4-Dihydroxyphenylethanol     | 4.91     | C <sub>8</sub> H <sub>10</sub> O <sub>3</sub>                 | M-H                | 153.056    | -0.465          | 89                | 123.04504                      |
| 24  | L-Tryptophan                   | 5.72     | C <sub>11</sub> H <sub>12</sub> N <sub>2</sub> O <sub>2</sub> | M+H                | 205.097    | -1.624          | 95                | 118.06494,<br>146.05992        |
| 25  | Geraniin                       | 5.99     | C <sub>41</sub> H <sub>28</sub> O <sub>27</sub>               | M-H                | 951.073    | -1.151          | 87                | 300.99863                      |
| 26  | Corilagin                      | 6.14     | C <sub>27</sub> H <sub>22</sub> O <sub>18</sub>               | M-H                | 633.072    | -1.504          | 86                | 300.99875                      |
| 27  | Procyanidin B1                 | 6.71     | C <sub>30</sub> H <sub>26</sub> O <sub>12</sub>               | M-H                | 577.135    | -1.089          | 88                | 407.07733,<br>289.07272        |
| 28  | Taxifolin                      | 6.88     | C <sub>15</sub> H <sub>12</sub> O <sub>7</sub>                | M+H                | 305.065    | -0.893          | 82                | 213.05511                      |
| 29  | 2-Adamantanone                 | 6.98     | C <sub>10</sub> H <sub>14</sub> O                             | M+H                | 151.112    | -0.403          | 71                | 95.04897                       |
| 30  | Epicatechin                    | 7.49     | C <sub>15</sub> H <sub>14</sub> O <sub>6</sub>                | M-H                | 289.071    | -1.101          | 92                | 245.08253,<br>109.02943        |
| 31  | p-Hydroxybenzaldehyde          | 7.50     | C <sub>7</sub> H <sub>6</sub> O <sub>2</sub>                  | M+H                | 123.044    | -1.366          | 87                | 95.04914,<br>67.05434          |
| 32  | Cryptochlorogenic acid         | 7.55     | C <sub>16</sub> H <sub>18</sub> O <sub>9</sub>                | M-H                | 353.087    | -1.414          | 94                | 173.04541,<br>135.04523        |
| 33  | Chlorogenic acid               | 7.55     | C <sub>16</sub> H <sub>18</sub> O <sub>9</sub>                | M-H                | 353.087    | -1.414          | 94                | 161.0246,<br>191.05602         |

| No. | Compound Name              | RT (min) | Formula                                         | Adduct | m/z (Apex) | m/z (Delta (ppm)) | Library Score (%) | MS <sup>2</sup> Fragments(m/z) |
|-----|----------------------------|----------|-------------------------------------------------|--------|------------|-------------------|-------------------|--------------------------------|
| 34  | 1-Caffeoylquinic acid      | 7.55     | C <sub>16</sub> H <sub>18</sub> O <sub>9</sub>  | M-H    | 353.087    | -1.414            | 94                | 179.03459,<br>191.05602        |
| 35  | Methyl gallate             | 7.55     | C <sub>8</sub> H <sub>8</sub> O <sub>5</sub>    | M-H    | 183.030    | -1.128            | 65                | 124.01654,<br>140.01144        |
| 36  | p-Hydroxy-cinnamic acid    | 7.55     | C <sub>9</sub> H <sub>8</sub> O <sub>3</sub>    | M-H    | 163.040    | -0.938            | 90                | 119.05014                      |
| 37  | 7-Hydroxycoumarin          | 7.56     | C <sub>9</sub> H <sub>6</sub> O <sub>3</sub>    | M+H    | 163.039    | -1.024            | 59                | 107.04874                      |
| 38  | Neochlorogenic acid        | 7.56     | C <sub>16</sub> H <sub>18</sub> O <sub>9</sub>  | M+H    | 355.102    | -1.386            | 93                | 117.0333,<br>163.03885         |
| 39  | Protocatechuic acid        | 7.81     | C <sub>7</sub> H <sub>6</sub> O <sub>4</sub>    | M-H    | 153.019    | -1.277            | 90                | 81.03452,<br>109.02959         |
| 40  | Gentisic acid              | 7.81     | C <sub>7</sub> H <sub>6</sub> O <sub>4</sub>    | M-H    | 153.019    | -1.277            | 90                | 109.02959                      |
| 41  | Geniposide                 | 8.00     | C <sub>17</sub> H <sub>24</sub> O <sub>10</sub> | M-H    | 387.129    | -1.185            | 58                | 225.07722                      |
| 42  | Fraxetin                   | 8.26     | C <sub>10</sub> H <sub>8</sub> O <sub>5</sub>   | M-H    | 207.030    | -0.923            | 87                | 192.0062                       |
| 43  | Isobutyl 4-Hydroxybenzoate | 8.32     | C <sub>11</sub> H <sub>14</sub> O <sub>3</sub>  | M+H    | 195.101    | -0.899            | 80                | 95.0489                        |
| 44  | 5-Hydroxy-1-tetralone      | 8.32     | C <sub>10</sub> H <sub>10</sub> O <sub>2</sub>  | M+H    | 163.075    | -0.542            | 82                | 107.049                        |
| 45  | Brevifolincarboxylic acid  | 8.46     | C <sub>13</sub> H <sub>8</sub> O <sub>8</sub>   | M+H    | 293.029    | -1.614            | 93                | 219.02873,<br>191.03387        |
| 46  | Androsin                   | 8.59     | C <sub>15</sub> H <sub>20</sub> O <sub>8</sub>  | M-H    | 327.108    | -1.086            | 85                | 165.05632                      |
| 47  | Acetophenone               | 8.95     | C <sub>8</sub> H <sub>8</sub> O                 | M+H    | 121.065    | -1.837            | 50                | 93.06953                       |
| 48  | Emodin                     | 9.03     | C <sub>15</sub> H <sub>10</sub> O <sub>5</sub>  | M+H    | 271.060    | -1.391            | 72                | 173.05992                      |
| 49  | Apigenin                   | 9.03     | C <sub>15</sub> H <sub>10</sub> O <sub>5</sub>  | M+H    | 271.060    | -1.391            | 72                | 197.05972                      |
| 50  | Caffeic acid               | 9.65     | C <sub>9</sub> H <sub>8</sub> O <sub>4</sub>    | M-H    | 179.035    | -1.317            | 92                | 107.0499,<br>135.04512         |
| 51  | Asarylaldehyde             | 9.78     | C <sub>10</sub> H <sub>12</sub> O <sub>4</sub>  | M+H    | 197.081    | -1.543            | 78                | 95.0489                        |

| No. | Compound Name                 | RT (min) | Formula                                         | Adduct            | m/z (Apex) | m/z (Delta ppm) | Library Score (%) | MS <sup>2</sup> Fragments(m/z) |
|-----|-------------------------------|----------|-------------------------------------------------|-------------------|------------|-----------------|-------------------|--------------------------------|
| 52  | Loganin                       | 9.81     | C <sub>17</sub> H <sub>26</sub> O <sub>10</sub> | M+NH <sub>4</sub> | 408.186    | -1.466          | N/A               | 109.06455                      |
| 53  | Taxifolin 7-rhamnoside        | 10.67    | C <sub>21</sub> H <sub>22</sub> O <sub>11</sub> | M-H               | 449.109    | -0.776          | 66                | 125.02455                      |
| 54  | Astilbin                      | 10.67    | C <sub>21</sub> H <sub>22</sub> O <sub>11</sub> | M-H               | 449.109    | -0.776          | 66                | 151.00357                      |
| 55  | 1,2,3,4,6-Pentagalloylglucose | 10.83    | C <sub>41</sub> H <sub>32</sub> O <sub>26</sub> | M-H               | 939.110    | -0.714          | 77                | 313.056                        |
| 56  | Naringenin chalcone           | 10.95    | C <sub>15</sub> H <sub>12</sub> O <sub>5</sub>  | M+H               | 273.075    | -1.249          | 94                | 153.01811                      |
| 57  | Engeletin                     | 10.95    | C <sub>21</sub> H <sub>22</sub> O <sub>10</sub> | M+H               | 435.128    | -1.051          | 56                | 153.01805                      |
| 58  | Fusarenon-X_M+HCOO            | 10.98    | C <sub>17</sub> H <sub>22</sub> O <sub>8</sub>  | M+HCOO            | 399.129    | -1.149          | N/A               | 59.01376                       |
| 59  | Scoparone                     | 10.99    | C <sub>11</sub> H <sub>10</sub> O <sub>4</sub>  | M+H               | 207.065    | -1.422          | 63                | 179.07014                      |
| 60  | Citropten                     | 10.99    | C <sub>11</sub> H <sub>10</sub> O <sub>4</sub>  | M+H               | 207.065    | -1.422          | 63                | 179.07014                      |
| 61  | Arglabin                      | 10.99    | C <sub>15</sub> H <sub>18</sub> O <sub>3</sub>  | M+H               | 247.132    | -1.529          | 68                | 187.11096                      |
| 62  | 4-Methylumbelliferone         | 11.01    | C <sub>10</sub> H <sub>8</sub> O <sub>3</sub>   | M+H               | 177.054    | -0.911          | N/A               | 149.05954                      |
| 63  | Leucoside                     | 11.38    | C <sub>26</sub> H <sub>28</sub> O <sub>15</sub> | M-H               | 579.135    | -0.389          | 87                | 284.03226                      |
| 64  | Isoferulic acid               | 11.38    | C <sub>10</sub> H <sub>10</sub> O <sub>4</sub>  | M-H               | 193.050    | -1.034          | 92                | 134.03722                      |
| 65  | Ferulic acid                  | 11.38    | C <sub>10</sub> H <sub>10</sub> O <sub>4</sub>  | M-H               | 193.050    | -1.034          | 92                | 134.03722,<br>178.02762        |
| 66  | Pinoresinol 4-O-glucoside     | 11.40    | C <sub>26</sub> H <sub>32</sub> O <sub>11</sub> | M-H               | 519.187    | -0.324          | 85                | 151.03992                      |
| 67  | Morin                         | 11.60    | C <sub>15</sub> H <sub>10</sub> O <sub>7</sub>  | M+H               | 303.050    | -1.421          | 86                | 229.04921,<br>137.02299        |
| 68  | Quercetin                     | 11.60    | C <sub>15</sub> H <sub>10</sub> O <sub>7</sub>  | M+H               | 303.050    | -1.421          | 86                | 153.01823,<br>165.0179         |
| 69  | Herbacetin                    | 11.60    | C <sub>15</sub> H <sub>10</sub> O <sub>7</sub>  | M+H               | 303.050    | -1.421          | 86                | 274.04788                      |

| No. | Compound Name                         | RT (min) | Formula                                         | Adduct               | m/z (Apex) | m/z (Delta (ppm)) | Library Score (%) | MS <sup>2</sup> Fragments(m/z) |
|-----|---------------------------------------|----------|-------------------------------------------------|----------------------|------------|-------------------|-------------------|--------------------------------|
| 70  | Isoquercitrin                         | 11.61    | C <sub>21</sub> H <sub>20</sub> O <sub>12</sub> | M-H                  | 463.088    | -1.327            | 93                | 300.02731,<br>271.02463        |
| 71  | Quercetin 3-O-beta-D-Glucuronide      | 11.67    | C <sub>21</sub> H <sub>18</sub> O <sub>13</sub> | M-H                  | 477.067    | -1.441            | 94                | 151.00371,<br>301.03503        |
| 72  | 2'-O-Galloylhyperin                   | 11.81    | C <sub>28</sub> H <sub>24</sub> O <sub>16</sub> | M-H                  | 615.099    | -0.162            | 88                | 151.0036,<br>301.03534         |
| 73  | Nivalenol_M+CH <sub>3</sub> OO        | 11.97    | C <sub>15</sub> H <sub>20</sub> O <sub>7</sub>  | M+CH <sub>3</sub> OO | 359.134    | -1.259            | N/A               | 59.01379                       |
| 74  | Kaempferol-7-O-beta-D-glucopyranoside | 12.63    | C <sub>21</sub> H <sub>20</sub> O <sub>11</sub> | M+H                  | 449.107    | -1.475            | 93                | 287.05502,<br>153.01836        |
| 75  | Astragalin                            | 12.64    | C <sub>21</sub> H <sub>20</sub> O <sub>11</sub> | M-H                  | 447.093    | -1.679            | 90                | 284.03241,<br>227.03476        |
| 76  | Cynaroside                            | 12.64    | C <sub>21</sub> H <sub>20</sub> O <sub>11</sub> | M-H                  | 447.093    | -1.679            | 90                | 151.00301,<br>285.03918        |
| 77  | Kaempferol                            | 12.65    | C <sub>15</sub> H <sub>10</sub> O <sub>6</sub>  | M+H                  | 287.055    | -0.911            | 88                | 153.01791,<br>258.05228        |
| 78  | Scutellarein                          | 12.65    | C <sub>15</sub> H <sub>10</sub> O <sub>6</sub>  | M+H                  | 287.055    | -0.911            | 88                | 213.05463                      |
| 79  | Scutellarin                           | 12.74    | C <sub>21</sub> H <sub>18</sub> O <sub>12</sub> | M-H                  | 461.072    | -1.676            | 91                | 239.03519,<br>285.04022        |
| 80  | Isorhamnetin                          | 12.74    | C <sub>16</sub> H <sub>12</sub> O <sub>7</sub>  | M+H                  | 317.065    | -1.533            | 91                | 302.04236,<br>153.01823        |
| 81  | Fisetin                               | 12.74    | C <sub>15</sub> H <sub>10</sub> O <sub>6</sub>  | M-H                  | 285.040    | -1.049            | 84                | 135.00845,<br>229.05051        |
| 82  | Salicylic acid                        | 13.11    | C <sub>7</sub> H <sub>6</sub> O <sub>3</sub>    | M-H                  | 137.024    | -0.711            | 91                | 93.03448,<br>65.03973          |
| 83  | Azelaic acid                          | 13.23    | C <sub>9</sub> H <sub>16</sub> O <sub>4</sub>   | M-H                  | 187.097    | -0.816            | 92                | 125.09721,<br>97.06583         |
| 84  | Genistin                              | 13.66    | C <sub>21</sub> H <sub>20</sub> O <sub>10</sub> | M+H                  | 433.112    | -1.280            | 87                | 271.06015                      |
| 85  | Oroxin A                              | 13.66    | C <sub>21</sub> H <sub>20</sub> O <sub>10</sub> | M+H                  | 433.112    | -1.280            | 87                | 271.06015                      |
| 86  | Glabrolide                            | 13.87    | C <sub>30</sub> H <sub>44</sub> O <sub>4</sub>  | M+H                  | 469.330    | -1.760            | 84                | 95.08536                       |

| No. | Compound Name              | RT<br>(min) | Formula                                          | Adduct            | <i>m/z</i><br>(Apex) | <i>m/z</i> (Delta<br>(ppm)) | Library<br>Score (%) | MS <sup>2</sup><br>Fragments( <i>m/z</i> ) |
|-----|----------------------------|-------------|--------------------------------------------------|-------------------|----------------------|-----------------------------|----------------------|--------------------------------------------|
| 87  | Phloretin                  | 13.95       | C <sub>15</sub> H <sub>14</sub> O <sub>5</sub>   | M+H               | 275.091              | -1.442                      | 90                   | 107.04897,<br>169.04906                    |
| 88  | Linolenic acid ethyl ester | 15.52       | C <sub>20</sub> H <sub>34</sub> O <sub>2</sub>   | M+H               | 307.263              | -1.512                      | 75                   | 81.06974                                   |
| 89  | Isopsoralen                | 15.62       | C <sub>11</sub> H <sub>6</sub> O <sub>3</sub>    | M+H               | 187.039              | -1.055                      | 84                   | 131.049                                    |
| 90  | Bergapten                  | 16.25       | C <sub>12</sub> H <sub>8</sub> O <sub>4</sub>    | M+H               | 217.049              | -1.100                      | 94                   | 202.02591,<br>202.02591                    |
| 91  | Methoxsalen                | 16.25       | C <sub>12</sub> H <sub>8</sub> O <sub>4</sub>    | M+H               | 217.049              | -1.100                      | 94                   | 202.02591,<br>189.05432,<br>185.02281      |
| 92  | Isobergapten               | 16.25       | C <sub>12</sub> H <sub>8</sub> O <sub>4</sub>    | M+H               | 217.049              | -1.100                      | 94                   | 202.02591,<br>161.0596                     |
| 93  | Astringin                  | 16.68       | C <sub>20</sub> H <sub>22</sub> O <sub>9</sub>   | M-H               | 405.119              | -0.979                      | 86                   | 243.06551                                  |
| 94  | Narirutin                  | 16.85       | C <sub>27</sub> H <sub>32</sub> O <sub>14</sub>  | M-H               | 579.172              | -0.411                      | N/A                  | 151.00386                                  |
| 95  | Norfenfluramine            | 18.25       | C <sub>10</sub> H <sub>12</sub> F <sub>3</sub> N | M+H               | 204.099              | -2.483                      | N/A                  | 159.04172                                  |
| 96  | Pedunculoside              | 18.41       | C <sub>36</sub> H <sub>58</sub> O <sub>10</sub>  | M+COOH            | 695.400              | -1.691                      | 82                   | 487.34186                                  |
| 97  | Rosamultin                 | 18.41       | C <sub>36</sub> H <sub>58</sub> O <sub>10</sub>  | M+Cl <sup>-</sup> | 685.372              | -1.283                      | 83                   | 487.34079                                  |
| 98  | Chrysin                    | 20.73       | C <sub>15</sub> H <sub>10</sub> O <sub>4</sub>   | M-H               | 253.050              | -0.548                      | 86                   | 209.06036,<br>143.05013                    |
| 99  | 7,8-Dihydroxyflavone       | 20.73       | C <sub>15</sub> H <sub>10</sub> O <sub>4</sub>   | M-H               | 253.050              | -0.548                      | 86                   | 151                                        |
| 100 | Rubiadin                   | 20.73       | C <sub>15</sub> H <sub>10</sub> O <sub>4</sub>   | M-H               | 253.050              | -0.548                      | 86                   | 181.0661,<br>209.06036                     |
| 101 | 6-Gingerol                 | 21.48       | C <sub>17</sub> H <sub>26</sub> O <sub>4</sub>   | M-H               | 293.176              | -0.687                      | 87                   | 177.09236,<br>236.10548                    |
| 102 | 6-Shogaol                  | 21.73       | C <sub>17</sub> H <sub>24</sub> O <sub>3</sub>   | M+H               | 277.179              | -2.240                      | 86                   | 137.05956                                  |
| 103 | Medicagenic acid           | 22.06       | C <sub>30</sub> H <sub>46</sub> O <sub>6</sub>   | M-H               | 501.322              | -0.946                      | 73                   | 437.30542                                  |

| No. | Compound Name        | RT (min) | Formula                                          | Adduct             | <i>m/z</i> (Apex) | <i>m/z</i> (Delta (ppm)) | Library Score (%) | MS <sup>2</sup> Fragments( <i>m/z</i> ) |
|-----|----------------------|----------|--------------------------------------------------|--------------------|-------------------|--------------------------|-------------------|-----------------------------------------|
| 104 | Eplerenone           | 22.82    | C <sub>24</sub> H <sub>30</sub> O <sub>6</sub>   | M+H                | 415.211           | -1.917                   | N/A               | 119.08518                               |
| 105 | Asiatic acid         | 23.68    | C <sub>30</sub> H <sub>48</sub> O <sub>5</sub>   | M+H                | 489.357           | -1.055                   | 77                | 205.15904                               |
| 106 | Ursolic acid         | 24.19    | C <sub>30</sub> H <sub>48</sub> O <sub>3</sub>   | M+H                | 457.367           | -0.946                   | 88                | 95.0853                                 |
| 107 | Quillaic acid        | 24.77    | C <sub>30</sub> H <sub>46</sub> O <sub>5</sub>   | M-H                | 485.327           | -1.404                   | 86                | 405.3154,<br>393.31696                  |
| 108 | Tributyl Phosphate   | 24.86    | C <sub>12</sub> H <sub>27</sub> O <sub>4</sub> P | M+H                | 267.172           | -1.498                   | N/A               | 116.99454,<br>98.98393                  |
| 109 | Germacrone           | 24.99    | C <sub>15</sub> H <sub>22</sub> O                | M+H                | 219.174           | -1.918                   | 76                | 159.11702,<br>95.08525                  |
| 110 | Aristolone           | 24.99    | C <sub>15</sub> H <sub>22</sub> O                | M+H                | 219.174           | -1.918                   | 76                | 121.06452                               |
| 111 | alpha-Cyperone       | 24.99    | C <sub>15</sub> H <sub>22</sub> O                | M+H                | 219.174           | -1.918                   | 76                | 145.10112                               |
| 112 | (+)-Nootkatone       | 24.99    | C <sub>15</sub> H <sub>22</sub> O                | M+H                | 219.174           | -1.918                   | 76                | 81.06967                                |
| 113 | Methyl hexadecanoate | 25.12    | C <sub>17</sub> H <sub>34</sub> O <sub>2</sub>   | M+HCO <sub>2</sub> | 315.254           | -0.745                   | 87                | 297.24435,<br>141.12846                 |
| 114 | alpha-Linolenic acid | 25.64    | C <sub>18</sub> H <sub>30</sub> O <sub>2</sub>   | M+H                | 279.231           | -1.594                   | 86                | 95.08533,<br>67.05418                   |

RT: retention time; *m/z*(Apex): mass charge ratio (measured value); MS<sup>2</sup> Fragments(*m/z*): secondary ion of mass spectrum.

**STable 2. The difference comparison of *T. rupestris* grow in varies environments**

| No.              | Compound Name                  | Comparison of median peak area |    |    |       |       |       |
|------------------|--------------------------------|--------------------------------|----|----|-------|-------|-------|
|                  |                                | ys                             | ss | sx | ys-ss | ys-sx | ss-sx |
| 1*               | Raffinose                      | B                              | A  | -  | ☆     | -     | -     |
| 2*               | Sucrose                        | B                              | A  | C  | ☆     | ★     | ★     |
| 3*               | Lactose                        | B                              | A  | C  | ☆     | ★     | ★     |
| 4 <sup>ac</sup>  | 2-Pyrrolidinecarboxylic acid   | B                              | A  | B  | ☆     | =     | ★     |
| 5*               | Quinic acid                    | C                              | B  | A  | ☆     | ☆     | ☆     |
| 6 <sup>bc</sup>  | Maleic acid                    | A                              | A  | B  | =     | ★     | ★     |
| 7*               | Nicotinamide                   | C                              | B  | A  | ☆     | ☆     | ☆     |
| 8*               | Citric acid                    | A                              | B  | C  | ★     | ★     | ★     |
| 9*               | L-Tyrosine                     | B                              | C  | A  | ★     | ☆     | ☆     |
| 10 <sup>ab</sup> | L-Leucine                      | A                              | B  | B  | ★     | ★     | =     |
| 11*              | Adenosine                      | C                              | A  | B  | ☆     | ☆     | ★     |
| 12               | Guanine                        | A                              | A  | A  | =     | =     | =     |
| 13*              | 5-Hydroxytryptophan            | A                              | C  | B  | ★     | ★     | ☆     |
| 14*              | Gallic acid                    | B                              | C  | A  | ★     | ☆     | ☆     |
| 15*              | Pyrogallol                     | B                              | C  | A  | ★     | ☆     | ☆     |
| 16*              | 5-Hydroxymethylfurfural        | B                              | C  | A  | ★     | ☆     | ☆     |
| 17 <sup>ab</sup> | L-Phenylalanine                | B                              | A  | A  | ☆     | ☆     | =     |
| 18 <sup>bc</sup> | Cinnamic acid                  | A                              | A  | B  | =     | ★     | ★     |
| 19*              | Helicid                        | A                              | B  | -  | ★     | -     | -     |
| 20*              | 4-Methoxysalicylic acid        | A                              | B  | C  | ★     | ★     | ★     |
| 21 <sup>ac</sup> | 4-Methyl-6,7-dihydroxycoumarin | A                              | B  | A  | ★     | =     | ☆     |
| 22 <sup>ac</sup> | 5,7-Dihydroxy-4-methylcoumarin | A                              | B  | A  | ★     | =     | ☆     |
| 23*              | 3,4-Dihydroxyphenylethanol     | A                              | B  | C  | ★     | ★     | ★     |
| 24 <sup>ab</sup> | L-Tryptophan                   | -                              | A  | A  | -     | -     | =     |
| 25 <sup>bc</sup> | Geraniin                       | B                              | B  | A  | =     | ☆     | ☆     |
| 26*              | Corilagin                      | B                              | C  | A  | ★     | ☆     | ☆     |

| No.              | Compound Name                 | Comparison of median peak area |    |    |       |       |       |
|------------------|-------------------------------|--------------------------------|----|----|-------|-------|-------|
|                  |                               | ys                             | ss | sx | ys-ss | ys-sx | ss-sx |
| 27*              | Procyanidin B1                | B                              | A  | C  | ☆     | ★     | ★     |
| 28 <sup>ab</sup> | Taxifolin                     | B                              | A  | A  | ☆     | ☆     | =     |
| 29*              | 2-Adamantanone                | A                              | B  | C  | ★     | ★     | ★     |
| 30*              | Epicatechin                   | B                              | A  | C  | ☆     | ★     | ★     |
| 31*              | p-Hydroxybenzaldehyde         | C                              | A  | B  | ☆     | ☆     | ★     |
| 32*              | Cryptochlorogenic acid        | B                              | C  | A  | ☆     | ☆     | ☆     |
| 33*              | Chlorogenic acid              | B                              | C  | A  | ★     | ☆     | ☆     |
| 34*              | 1-Caffeoylquinic acid         | B                              | C  | A  | ★     | ☆     | ☆     |
| 35*              | Methyl gallate                | C                              | B  | A  | ☆     | ☆     | ☆     |
| 36 <sup>bc</sup> | p-Hydroxy-cinnamic acid       | A                              | A  | -  | =     | -     | -     |
| 37*              | 7-Hydroxycoumarin             | B                              | C  | A  | ★     | ☆     | ☆     |
| 38*              | Neochlorogenic acid           | B                              | C  | A  | ★     | ☆     | ☆     |
| 39*              | Protocatechuic acid           | C                              | B  | A  | ☆     | ☆     | ☆     |
| 40*              | Gentisic acid                 | C                              | B  | A  | ☆     | ☆     | ☆     |
| 41*              | Geniposide                    | B                              | -  | A  | -     | ☆     | -     |
| 42*              | Fraxetin                      | B                              | C  | A  | ★     | ☆     | ☆     |
| 43 <sup>ab</sup> | Isobutyl 4-Hydroxybenzoate    | A                              | -  | -  | -     | -     | -     |
| 44*              | 5-Hydroxy-1-tetralone         | A                              | C  | B  | ★     | ★     | ☆     |
| 45 <sup>bc</sup> | Brevifolincarboxylic acid     | B                              | B  | A  | =     | ☆     | ☆     |
| 46*              | Androsin                      | B                              | A  | -  | ☆     | -     | -     |
| 47*              | Acetophenone                  | B                              | A  | C  | ☆     | ★     | ★     |
| 48 <sup>bc</sup> | Emodin                        | A                              | A  | B  | =     | ★     | ★     |
| 49 <sup>bc</sup> | Apigenin                      | A                              | A  | B  | =     | ★     | ★     |
| 50*              | Caffeic acid                  | -                              | B  | A  | -     | -     | ☆     |
| 51*              | Asarylaldehyde                | A                              | B  | C  | ★     | ★     | ★     |
| 52*              | Loganin                       | A                              | B  | C  | ★     | ★     | ★     |
| 53 <sup>a</sup>  | Taxifolin 7-rhamnoside        | B                              | A  | AB | ☆     | =     | =     |
| 54 <sup>a</sup>  | Astilbin                      | B                              | A  | AB | ☆     | =     | =     |
| 55*              | 1,2,3,4,6-Pentagalloylglucose | C                              | B  | A  | ☆     | ☆     | ☆     |

| No.              | Compound Name                         | Comparison of median peak area |    |    |       |       |       |
|------------------|---------------------------------------|--------------------------------|----|----|-------|-------|-------|
|                  |                                       | ys                             | ss | sx | ys-ss | ys-sx | ss-sx |
| 56 <sup>bc</sup> | Naringenin chalcone                   | A                              | A  | B  | =     | ★     | ★     |
| 57 <sup>bc</sup> | Engeletin                             | A                              | A  | B  | =     | ★     | ★     |
| 58 <sup>*</sup>  | Fusarenon-X_M+HCOO                    | C                              | A  | B  | ☆     | ☆     | ★     |
| 59 <sup>ac</sup> | Scoparone                             | -                              | A  | -  | -     | -     | -     |
| 60 <sup>ac</sup> | Citropten                             | B                              | A  | B  | ☆     | =     | ★     |
| 61 <sup>ab</sup> | Arglabin                              | B                              | A  | A  | ☆     | ☆     | =     |
| 62 <sup>*</sup>  | 4-Methylumbelliferone                 | C                              | B  | A  | ☆     | ☆     | ☆     |
| 63 <sup>*</sup>  | Leucoside                             | A                              | C  | B  | ★     | ★     | ☆     |
| 64 <sup>*</sup>  | Isoferulic acid                       | -                              | B  | A  | -     | -     | ☆     |
| 65 <sup>*</sup>  | Ferulic acid                          | A                              | C  | B  | ★     | ★     | ☆     |
| 66 <sup>*</sup>  | Pinoresinol 4-O-glucoside             | -                              | A  | B  | -     | -     | ★     |
| 67 <sup>*</sup>  | Morin                                 | A                              | C  | B  | ★     | ★     | ☆     |
| 68 <sup>*</sup>  | Quercetin                             | A                              | C  | B  | ★     | ★     | ☆     |
| 69 <sup>*</sup>  | Herbacetin                            | A                              | C  | B  | ★     | ★     | ☆     |
| 70 <sup>ac</sup> | Isoquercitrin                         | A                              | B  | A  | ★     | =     | ☆     |
| 71 <sup>*</sup>  | Quercetin 3-O-beta-D-Glucuronide      | A                              | B  | C  | ★     | ★     | ★     |
| 72 <sup>bc</sup> | 2'-O-Galloylhyperin                   | -                              | -  | A  | -     | -     | -     |
| 73 <sup>*</sup>  | Nivalenol_M+CH3OO                     | B                              | A  | C  | ☆     | ★     | ★     |
| 74 <sup>ab</sup> | Kaempferol-7-O-beta-D-glucopyranoside | A                              | -  | -  | -     | -     | -     |
| 75 <sup>ac</sup> | Astragalin                            | A                              | B  | A  | ★     | =     | ☆     |
| 76 <sup>ac</sup> | Cynaroside                            | A                              | B  | A  | ★     | =     | ☆     |
| 77 <sup>ac</sup> | Kaempferol                            | A                              | B  | A  | ★     | =     | ☆     |
| 78 <sup>ac</sup> | Scutellarein                          | A                              | B  | A  | ★     | =     | ☆     |
| 79 <sup>*</sup>  | Scutellarin                           | A                              | C  | B  | ★     | ★     | ☆     |
| 80 <sup>bc</sup> | Isorhamnetin                          | A                              | A  | B  | =     | ★     | ★     |
| 81 <sup>*</sup>  | Fisetin                               | C                              | A  | B  | ☆     | ☆     | ★     |
| 82 <sup>bc</sup> | Salicylic acid                        | -                              | -  | A  | -     | -     | -     |

| No.               | Compound Name              | Comparison of median peak area |    |    |       |       |       |
|-------------------|----------------------------|--------------------------------|----|----|-------|-------|-------|
|                   |                            | ys                             | ss | sx | ys-ss | ys-sx | ss-sx |
| 83 <sup>a</sup>   | Azelaic acid               | B                              | A  | AB | ☆     | =     | =     |
| 84 <sup>*</sup>   | Genistin                   | A                              | C  | B  | ★     | ★     | ☆     |
| 85 <sup>ab</sup>  | Oroxin A                   | A                              | -  | -  | -     | -     | -     |
| 86 <sup>*</sup>   | Glabrolide                 | C                              | B  | A  | ☆     | ☆     | ☆     |
| 87 <sup>*</sup>   | Phloretin                  | A                              | B  | C  | ★     | ★     | ★     |
| 88 <sup>bc</sup>  | Linolenic acid ethyl ester | A                              | A  | B  | =     | ★     | ★     |
| 89 <sup>*</sup>   | Isopsoralen                | C                              | B  | A  | ☆     | ☆     | ☆     |
| 90 <sup>*</sup>   | Bergapten                  | C                              | B  | A  | ☆     | ☆     | ☆     |
| 91 <sup>*</sup>   | Methoxsalen                | C                              | B  | A  | ☆     | ☆     | ☆     |
| 92 <sup>*</sup>   | Isobergapten               | C                              | B  | A  | ☆     | ☆     | ☆     |
| 93 <sup>ab</sup>  | Astringin                  | -                              | A  | B  | -     | -     | ★     |
| 94 <sup>*</sup>   | Narirutin                  | B                              | A  | C  | ☆     | ★     | ★     |
| 95                | Norfenfluramine            | A                              | A  | A  | =     | =     | =     |
| 96 <sup>*</sup>   | Pedunculoside              | A                              | B  | C  | ★     | ★     | ★     |
| 97 <sup>*</sup>   | Rosamultin                 | A                              | B  | C  | ★     | ★     | ★     |
| 98 <sup>*</sup>   | Chrysin                    | A                              | B  | -  | ★     | -     | -     |
| 99 <sup>*</sup>   | 7,8-Dihydroxyflavone       | A                              | B  | -  | ★     | -     | -     |
| 100 <sup>*</sup>  | Rubiadin                   | A                              | B  | C  | ★     | ★     | ★     |
| 101 <sup>ab</sup> | 6-Gingerol                 | B                              | A  | A  | ☆     | ☆     | =     |
| 102 <sup>*</sup>  | 6-Shogaol                  | C                              | B  | A  | ☆     | ☆     | ☆     |
| 103 <sup>*</sup>  | Medicagenic acid           | A                              | B  | C  | ★     | ★     | ★     |
| 104               | Eplerenone                 | A                              | A  | A  | =     | =     | =     |
| 105 <sup>*</sup>  | Asiatic acid               | A                              | B  | C  | ★     | ★     | ★     |
| 106 <sup>*</sup>  | Ursolic acid               | A                              | B  | -  | ★     | -     | -     |
| 107 <sup>*</sup>  | Quillaic acid              | B                              | A  | C  | ☆     | ★     | ★     |
| 108 <sup>bc</sup> | Tributyl Phosphate         | A                              | A  | B  | =     | ★     | ★     |
| 109 <sup>ac</sup> | Germacrone                 | -                              | A  | -  | -     | -     | -     |
| 110 <sup>*</sup>  | Aristolone                 | C                              | A  | B  | ☆     | ☆     | ★     |
| 111 <sup>*</sup>  | alpha-Cyperone             | C                              | A  | B  | ☆     | ☆     | ★     |

| No.               | Compound Name        | Comparison of median peak area |    |    |       |       |       |
|-------------------|----------------------|--------------------------------|----|----|-------|-------|-------|
|                   |                      | ys                             | ss | sx | ys-ss | ys-sx | ss-sx |
| 112 <sup>ab</sup> | (+)-Nootkatone       | A                              | -  | -  | -     | -     | -     |
| 113 <sup>ab</sup> | Methyl hexadecanoate | B                              | A  | A  | ☆     | ☆     | =     |
| 114 <sup>ac</sup> | alpha-Linolenic acid | B                              | A  | B  | ☆     | =     | ★     |

Note: The two groups with no significant difference ( $P \geq 0.05$ ) have been assimilated.

\*:  $P < 0.05$ ; a: There was comparison significance between ys and ss,  $P < 0.05$ ; b: ys 与 sx There was comparison significance between ys and sx,  $P < 0.05$ ; c: There was comparison significance between ss and sx,  $P < 0.05$ ; ys: Wild Taihang Flower; ss: Artificially planting Taihang flowers on the mountain; sx: Artificial cultivation of taiwanese flowers under the mountain; all: A mixture of three batches of taiwanese flower extracts grown in different environments mixed in equal amounts. -: No. Comparison of median peak areas of the three samples: the largest was A, the second was B, the third was C, and no difference with the remaining two samples was AB; ☆: Down-regulation; =: No difference; ★: Up-regulation

**STable 3. The result of molecular docking**

| Compounds name                  | CID      | S(Kcal/mol) | Amino acid residues(2QMJ)                                                                                                                      | Ligand/Receptor/Interaction                                                                                                                                                                                                                                                                                |
|---------------------------------|----------|-------------|------------------------------------------------------------------------------------------------------------------------------------------------|------------------------------------------------------------------------------------------------------------------------------------------------------------------------------------------------------------------------------------------------------------------------------------------------------------|
| Potentillin                     | 452242   | -8.0015     | VAL451, PHE450, GLU404, LYS480, THR204, ASP203, ARG526, THR205, ASP542, ASP443, MET444, PHE575, TRP406, TYR299, GLY602, ALA576, GLN603, TYR605 | O12OD2/ASP542(A)/H-donor <sup>①</sup> ,<br>O13OD2/ASP203(A)/H-donor <sup>①</sup> ,<br>O22OE1/GLU404(A)/H-donor <sup>①</sup>                                                                                                                                                                                |
| Ellagic Acid 4-O-Xylopyranoside | 5487461  | -7.6251     | SER288, VAL779, LYS776, ALA285, HIS645, ALA780, ASP777, PRO287, SER521, THR775, ARG520, LEU286, PHE522, ILE523, ALA537, PHE535, ALA536         | O3O/PHE535 (A)/H-donor,<br>O4O/PHE535 (A)/H-donor,<br>C16O/ARG520 (A)/H-donor,<br>O3/N/ILE523(A)/ H-acceptor,<br>O10N/ASP777 (A)/H-acceptor,<br>O11CE/LYS534 (A)/H-acceptor <sup>①</sup>                                                                                                                   |
| Ellagic Acid Glucoside          | 91072206 | -7.3979     | ILE364, TRP406, TYR299, TRP441, ILE328, ASP327, PHE575, HIS600, TRP539, ASP443, MET444, ASP542, ARG526, SER448, ASP203, PHE450                 | O4OD2/ASP327(A)/H-donor <sup>①</sup> ,<br>O5OD1/ASP542(A)/H-donor <sup>①</sup> ,<br>O9OD2/ASP203(A)/H-donor <sup>①</sup> ,<br>C16OD2/ASP443(A)/H-donor <sup>①</sup> ,<br>O3NE2/HIS600(A)/H-acceptor <sup>①</sup> ,<br>O4NE2/HIS600(A)/H-acceptor <sup>①</sup> ,<br>O5NH1/ARG526(A)/H-acceptor <sup>①</sup> |
| Procyanidin B2-3'-O-gallate     | 15593124 | -6.9372     | TYR605, ASN207, THR211, LEU473, ASN209, THR205, ASP542, ASP203, THR204, ARG526, TYR214, MET444, ASP443, TRP406, PHE575, ALA576                 | O9OD2/ASP203 (A)/H-donor <sup>①</sup> ,<br>O10OD1/ASP203(A)/H-donor <sup>①</sup> ,<br>O11SD/MET444(A)/H-donor <sup>①</sup> ,<br>O13OD2/ASP542 (A)/H-donor <sup>①</sup>                                                                                                                                     |

| Compounds name                     | CID       | S(Kcal/mol) | Amino acid residues(2QMJ)                                                                                              | Ligand/Receptor/Interaction                                                                                                                                                                                                                                                                            |
|------------------------------------|-----------|-------------|------------------------------------------------------------------------------------------------------------------------|--------------------------------------------------------------------------------------------------------------------------------------------------------------------------------------------------------------------------------------------------------------------------------------------------------|
| 4'-O-Arabinofuranosylsuccinic Acid | 101129362 | -6.6741     | PHE450, TYR299, ASP327, ILE328, ILE364, TRP406, ASP443, ASP203, ARG526, ASP542, MET444, TRP539, PHE575, SER448, GLN603 | O3OD2/ASP443(A)/H-donor <sup>①</sup> ,<br>O4OD1/ASP443(A)/H-donor <sup>①</sup> ,<br>O4OD2/ASP443(A)/H-donor <sup>①</sup> ,<br>O5OD1/ASP327(A)/H-donor <sup>①</sup> ,<br>O8OD2/ASP542(A)/H-donor <sup>①</sup> ,<br>O3NE1/TRP406(A)/H-acceptor <sup>①</sup> ,<br>O4NH1/ARG526(A)/H-acceptor <sup>①</sup> |
| Casuarinin                         | 14035442  | -6.0355     | LEU473, THR211, THR204, THR205, ASN209, ASN207, GLY208, THR544, THR546, ASP549, ASP548, TRP552                         | O14OD2/ASP549 (A)/H-donor <sup>①</sup> ,<br>O15OG1/THR544(A)/H-donor <sup>①</sup> ,<br>O13ND2/ASN207(A)/H-acceptor <sup>①</sup> ,<br>O18N/THR205(A)/H-acceptor                                                                                                                                         |
| Ellagic Acid                       | 5281855   | -5.3858     | ASP702, GLU704, LYS724, TYR626, ILE725, GLY726, LEU727, MET718, LEU720, HIS728, GLU719, TRP711                         | O3OE2/GLU704(A)/H-donor <sup>①</sup> ,<br>O8CA/GLY726(A)/H-acceptor                                                                                                                                                                                                                                    |
| Phenylalanine                      | 6140      | -5.0462     | LEU720, MET718, TYR626, ILE725, GLU719, LYS724, GLY726, GLU704, LEU727, TYR703, HIS728, ASP702                         | O1O/LEU727 (A)/H-donor,<br>N3O/ILE725 (A)/H-donor,<br>O2N/GLU704 (A)/H-acceptor,<br>N3OH/TYR626 (A)/H-acceptor <sup>①</sup>                                                                                                                                                                            |

S: Binding energy; ①: sidechain.

**STable 4. Cross-reference of active screening compounds (Table 2) with global metabolomics dataset (STable 1/STable 2)**

| No. (Table 2) | Compound name               | RT (min) (Table 2) | Matched entry in STable 1            | Peak area in Detected sx (STable 2) globally? | Remarks                                                   |
|---------------|-----------------------------|--------------------|--------------------------------------|-----------------------------------------------|-----------------------------------------------------------|
| 1             | Proline                     | 1.179              | No. 4 (2-Pyrrolidinecarboxylic acid) | ✓                                             | Proline present as cyclized form; consistent.             |
| 2             | HHDP-D-Glucose              | 1.625              | –                                    | ✗                                             | Related ellagitannins (No. 26, 55) present.               |
| 3             | Phenylalanine               | 2.445              | No. 17 (L-Phenylalanine)             | ✓                                             | High abundance in sx; fully consistent.                   |
| 4             | Casuariin                   | 3.143              | –                                    | ✗                                             | Large tannin; below Orbitrap detection limit.             |
| 5             | Epicatechin                 | 4.497              | No. 30 (Epicatechin)                 | ✓                                             | Present in sx, lower abundance.                           |
| 6             | Tryptophan                  | 4.525              | No. 24 (L-Tryptophan)                | ✓                                             | Present in sx; consistent.                                |
| 7             | Pedunculagin                | 4.818              | –                                    | ✗                                             | Hydrolyzable tannin; not annotated.                       |
| 8             | Chlorogenic acid            | 6.189              | No. 33                               | ✓                                             | High abundance; fully consistent.                         |
| 9             | Catechin                    | 6.501              | –                                    | ✗                                             | Isomer of epicatechin (No. 30); distinguished in Q-TOF.   |
| 10            | BLicoagroside B             | 7.756              | –                                    | ✗                                             | Minor glycoside; only detected after targeted extraction. |
| 11            | Luteolin diglucuronide      | 9.568              | –                                    | ✗                                             | Low abundance flavone; not in global library.             |
| 12            | Tricetin diglucuronide      | 11.284             | –                                    | ✗                                             | Similar to above.                                         |
| 13            | Ellagic acid glucoside      | 12.384             | – (No. 26, 55 related)               | ✗                                             | Free glucoside not annotated; derivatives present.        |
| 14            | Procyanidin B2-3'-O-gallate | 14.196             | –                                    | ✗                                             | Large proanthocyanidin; not                               |

| No.<br>(Table 2) | Compound name                     | RT (min)<br>(Table 2) | Matched entry in STable 1 | Peak area in Detected<br>sx (STable 2) globally? | Remarks                                                                  |
|------------------|-----------------------------------|-----------------------|---------------------------|--------------------------------------------------|--------------------------------------------------------------------------|
| 15               | 4'-O-Arabinofuranosylellagic acid | 18.561                | –                         | –                                                | ✗<br>annotated.<br>Ellagic acid pentoside; below detection.              |
| 16               | Ellagic acid 2-rhamnoside         | 18.690                | –                         | –                                                | ✗<br>Not annotated.                                                      |
| 17               | Ellagic acid 4-O-xylopyranoside   | 19.809                | –                         | –                                                | ✗<br>Not annotated.                                                      |
| 18               | Ellagic acid (free)               | 20.198                | –                         | –                                                | ✗<br>Possibly suppressed in ESI- or co-eluted.                           |
| 19               | Potentillin                       | 21.229                | –                         | –                                                | ✗<br>High molecular weight tannin; optimized Q-TOF method detected it.   |
| 20               | Isoquercitrin                     | 21.932                | No. 70                    | A                                                | ☑<br>Fully consistent.                                                   |
| 21               | Luteolin-7-O-glucoside            | 24.975                | No. 76 (Cynaroside)       | A                                                | ☑<br>Fully consistent (synonym).                                         |
| 22               | Kaempferol-3-O-glucuronoside      | 25.052                | – (No. 75 related)        | –                                                | ⚠<br>Kaempferol glucoside (No. 75) present; glucuronoside not annotated. |
| 23               | Ducheside A                       | 25.518                | –                         | –                                                | ✗<br>Ellagic acid derivative; not annotated.                             |

☑ = Detected and matched; ⚠ = Partially matched via related compound; ✗ = Not detected in global run.

**Note:** Among the 23 compounds listed in Table 2, 8 (proline, phenylalanine, epicatechin, tryptophan, chlorogenic acid, isoquercitrin, luteolin-7-O-glucoside, and indirectly kaempferol-3-O-glucuronoside) were positively identified in the global UPLC-MS/MS analysis of the mixed sample (STable 1), and their relative abundances in the sx extract are provided in STable 2. This confirms substantial chemical overlap between the two analytical datasets. The remaining 15 compounds are predominantly high-molecular-weight tannins (e.g., casuariin, pedunculagin, potentillin) and ellagic acid glycosides, which were either below the detection threshold of the Orbitrap run or poorly ionized under the original ESI conditions. Among these, seven of the eight  $\alpha$ -glucosidase binders (Table 3) fall into this category – they were not detected in the global profiling but were successfully captured in the second analysis because the extract was prepared at a higher concentration, with longer ultrasonication, and analyzed by a Q-TOF platform optimized for tannin detection. Importantly, all 23 compounds originated from the same batch of sx plant material, and the 8 overlapping compounds demonstrate that the active screening was conducted on the same chemical matrix as the global profiling. The additional compounds identified in the second analysis represent a deeper, not contradictory, characterization of the sample.

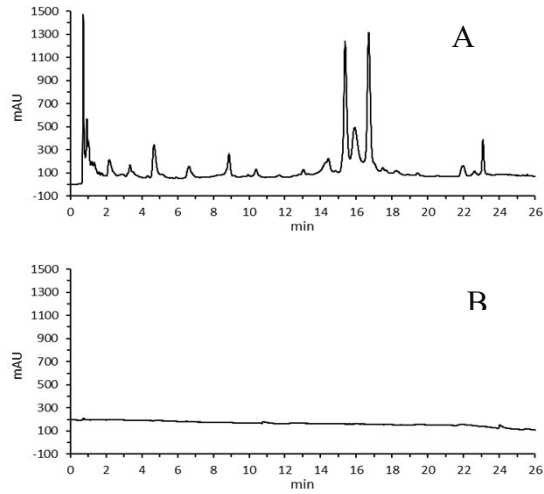

**SFigure 1. Chromatograms of first online extraction (A) and second online extraction (B)**

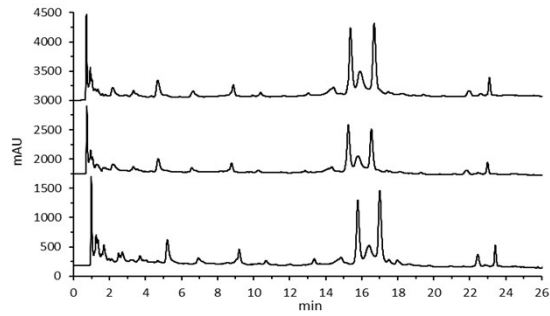

**SFigure 2. Reproducibility chromatogram of online extraction sample**

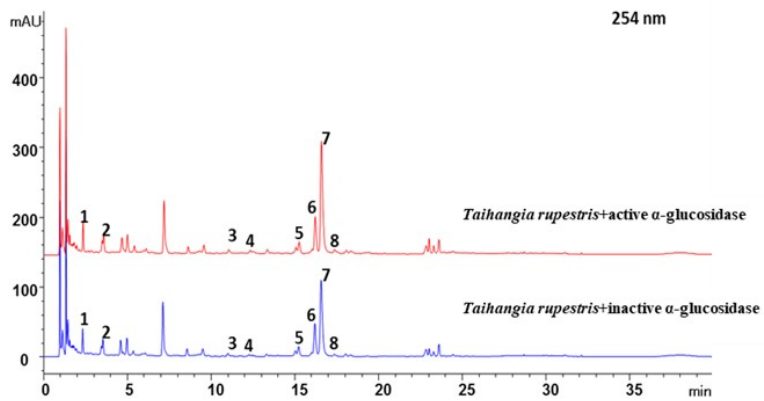

**SFigure 3. Ultrafiltration centrifugal chromatogram of *T. rupestris***

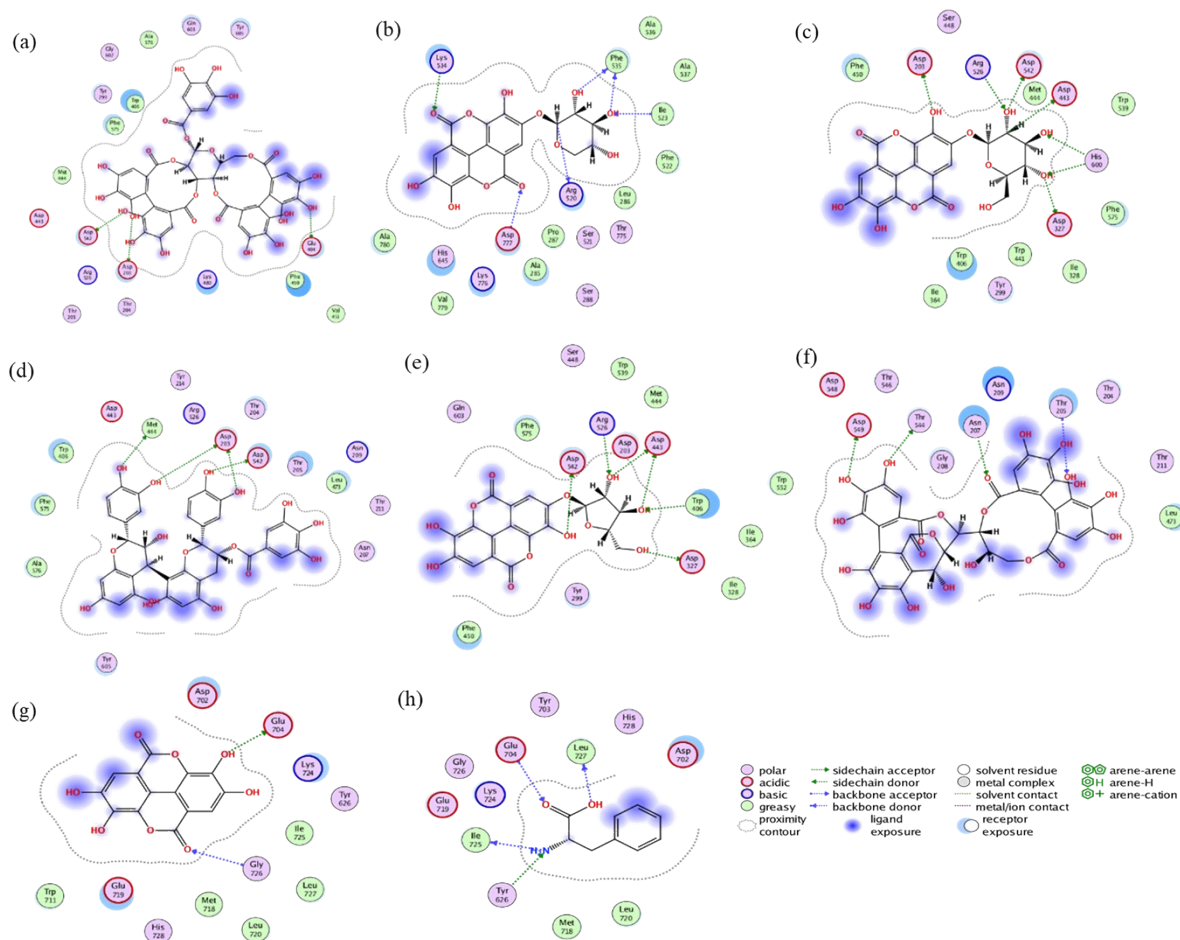

**SFigure 4. Optimal conformation of the molecular docking between the active component of *T. rupestris* and  $\alpha$ -glucosidase-associated protein (2QMJ) ((a): potentillin, (b): ellagic acid 4-*o*-xylopyranoside, (c): ellagic acid glucoside, (d): procyanidin B2-3'-*o*-gallate, (e): 4'-*o*-arabinofuranosylellagic acid, (f): casuariin, (g): ellagic acid, (h): phenylalanine)**
